# Supplementary material for: Synthesis, characterization and in vitro screening of a nano-hydroxyapatite/chitosan/Euryale ferox nanoensemble – an inimitable approach for bone tissue engineering
Source: Royal Society of Chemistry journal article supplement (doi:10.1039/c7nj02953e), 2017-11-17
Supplement: c7nj02953e1.pdf [file c7nj02953e1.pdf]

## Supplementary Information

### **Synthesis, Characterization and *in vitro* screening of nano-Hydroxyapatite/Chitosan/Euryale ferox nanoensemble- An inimitable approach for Bone Tissue Engineering**

Mohammad Shakir<sup>a\*</sup>, Sumbul Mirza<sup>a</sup>, Reshma Jolly<sup>a</sup>, Ahmar Rauf<sup>b</sup>, Mohammad Owais<sup>b</sup>

<sup>a</sup>Inorganic Chemistry Laboratory, Department of Chemistry, Aligarh Muslim University, Aligarh 202002, India

<sup>b</sup>Molecular Immunology Group Lab., Interdisciplinary Biotechnology Unit, Aligarh Muslim University, Aligarh 202002, India

| <b>S.No.</b> | <b>Table of contents</b>                     | <b>Page No.</b> |
|--------------|----------------------------------------------|-----------------|
| <b>1</b>     | <b>Synthesis of n-HA</b>                     | <b>S2</b>       |
| <b>2</b>     | <b>Agar Diffusion Method</b>                 | <b>S2</b>       |
| <b>3</b>     | <b>RBC Lysis test</b>                        | <b>S3</b>       |
| <b>4</b>     | <b>Figure of percent lysis of n-HA/CS/EF</b> | <b>S4</b>       |
| <b>5</b>     | <b>EDS of n-HA/CS and n-HA/CS/EF</b>         | <b>S4</b>       |

## **1. Experimental**

### **1.1. Synthesis of nano-hydroxyapatite**

Wet chemical synthesis was performed based on the use of  $\text{Ca}(\text{NO}_3)_2 \cdot 4\text{H}_2\text{O}$  and  $(\text{NH}_4)_2\text{HPO}_4$  (DAHP) precursors for the preparation of n-HA nanocrystals where 0.6mol of  $\text{Ca}(\text{NO}_3)_2 \cdot 4\text{H}_2\text{O}$  was added drop-wise to 0.4mol of DAHP at constant stirring in order to obtain Ca/P ratio of 1.67. The pH value of the mixture was maintained above 10 throughout the precipitation process by the addition of ammonia (25%) solution. The resultant precipitate obtained by vacuum filtration was rinsed with deionised water and oven dried at 85 °C.<sup>1,2</sup>

## **2. Characterizations**

### **2.1 Agar Diffusion Method**

The inoculum was prepared by diluting the overnight cultures with sterile normal saline to a 0.5 McFarland standard. The agar petri plates were prepared by spreading the  $1 \times 10^8$  CFU per 50  $\mu\text{L}$  of mature broth culture of specific bacterial strains with a sterile L-shaped glass rod. Now, the stock solution of formulations of n-HA/CS/EF nanocomposite suspended in sterile PBS was used to evaluate the antibacterial activity. The experimental procedure was performed under sterile conditions using bio-safety level 2 (BSL-2) hoods. The petri plates were incubated at 37 °C overnight. The susceptibility of our formulation was determined on the basis of zone of clearance developed against human pathogenic strains *E.coli* and *S.aureus*. The inhibition zone was analysed thrice and the average was calculated for the antibacterial activity and compared with the reference drug vancomycin as a control.<sup>3</sup>

## 2.2. RBC Lysis test

In vitro erythrocyte lysis test was carried out as a primary toxicity test of the as-synthesized nanocomposite formulations, which is evaluated by quantifying the haemoglobin released as a result of membrane leakage or disruption caused by incorporation of low doses of the n-HA/CS/EF nanocomposite. In brief, centrifugation of the fresh blood procured from a healthy rabbit collected in anticoagulant solution (EDTA) was performed at 1000g for 10 min at 4°C. Both buffy coat and plasma were discarded. Washed erythrocytes were diluted with isotonic buffer (20 mM PBS) to prepare 50% haematocrit. n-HA/CS/EF nanocomposite was incubated in RBC suspension with different concentrations at 37 °C for 1 h to determine the degree of haemolysis.<sup>4</sup> After the centrifugation of incubated solutions at 1500g for 15min, the supernatant obtained was characterized by UV-visible spectroscopy ( $\lambda_{\text{max}} = 576\text{nm}$ ). The haemolysis percent was measured by the following equation:

$$\% \text{ Haemolysis} = \{(\text{Abs(T)} - \text{Abs(C)} / \text{Abs(100\%)} - \text{Abs (C)})\} * 100$$

where, Abs(T) = Absorbance of the supernatant from samples incubated with n-HA/CS/EF.

Abs(c) = Absorbance of the supernatant from controls (normal saline).

Abs(100%) = Absorbance of the supernatant of controls incubated in the presence of 1% Triton®

X-100, which causes complete lysis of RBCs (total lysis).

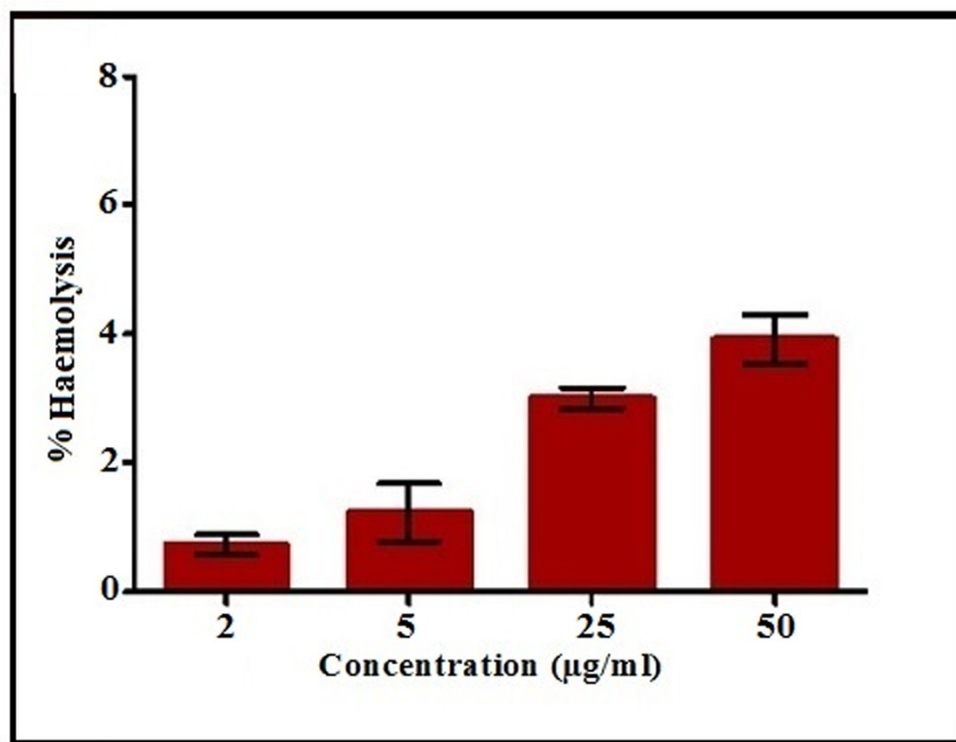

**Fig. S1.** RBC lysis of n-HA/CS/EF nanocomposite

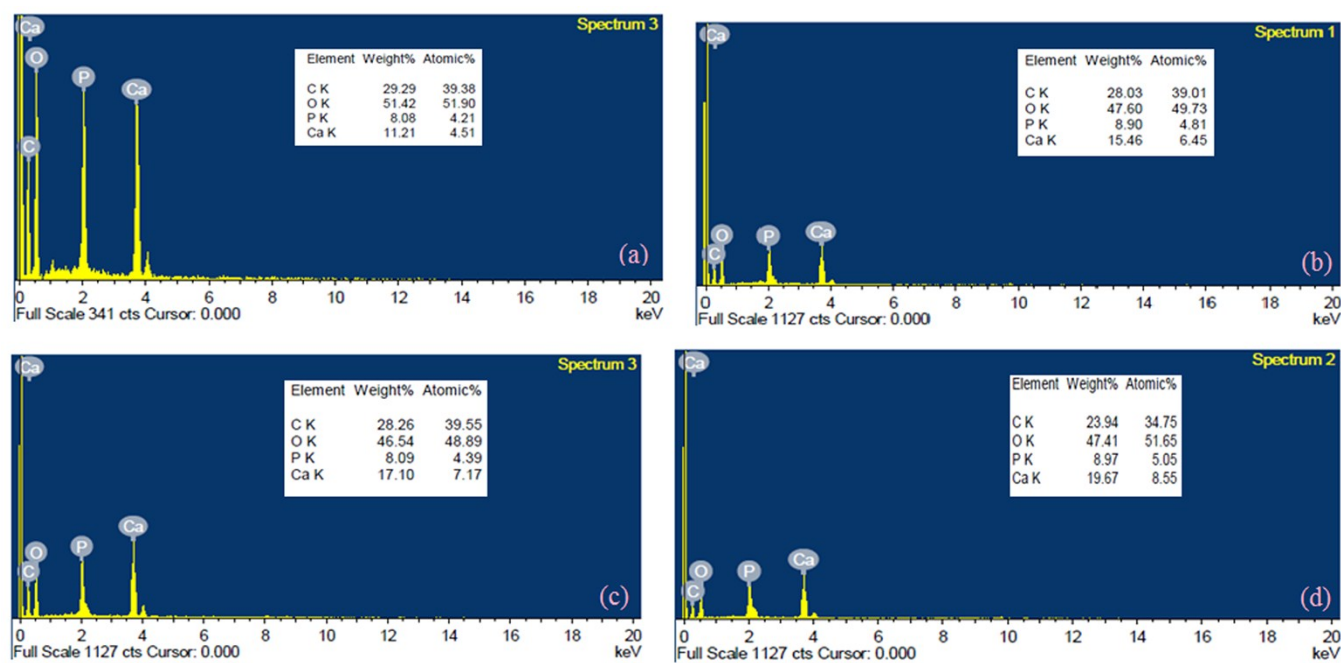

**Fig. S2.** EDX of (a) n-HA/CS (b) n-HA/CS/EF nanocomposite and their respective SBF study after 30 days (c-d).

## References

- 1 A. Chandrasekar, S. Sagadevan and A. Dakshnamoorthy, *Int. J. Phys. Sci.*, 2013, **8**, 1639–1645.
- 2 D. N. Ungureanu, N. Angelescu, R. M. Ion, E. V. Stoian and C. Z. Rizescu, *Recent Res. Commun. Autom. Signal Process. Nanotechnology, Astron. Nucl. Phys.*, **2011**, 296–301.
- 3 C. Pérez, A. M. Agnese and J. L. Cabrera, *J. Ethnopharmacol.*, 1999, **66**, 91–96.
- 4 M. Oves, M. S. Khan, A. Zaidi, A. S. Ahmed, F. Ahmed, E. Ahmad, A. Sherwani, M. Owais and A. Azam, *PLoS One*, , DOI:10.1371/journal.pone.0059140.
